# Supplementary material
Source: publisher figshare collection journal article supplement (https://acs.figshare.com/ndownloader/files/13757459)
Supplement: Supplementary file 1 [file 13757459]

# Supporting Information

## Thiourea Interfacial Modification for High Efficient Planar Perovskite Solar Cells

*Hui Luo, Jihuai Wu\*, Xuping Liu, Yuqian Yang, Quanzhen Liu, Mingjing Zhang, Pengqiang  
Yuan, Weihai Sun, Zhang Lan, and Jianming Lin*

Eng. Res. Centre of Environment-Friendly Functional Materials, Ministry of Education, Fujian  
Provincial Key Laboratory of Photoelectric Functional Materials, College of Material Science and  
Engineering, Huaqiao University No.668 Jimei Avenue, Xiamen, Fujian 361021, China.

E-mail: jhwu@hqu.edu.cn

### Experimental Section

#### Figure S1

#### Figure S2

#### Figure S3

## Experimental Section

### *Materials and synthesis*

Thiourea,  $\text{TiCl}_4$ ,  $\text{CH}_3\text{N}_2(\text{FA})\text{I}$ ,  $\text{CH}_3\text{NH}_3(\text{MA})\text{Br}$ , absolute ethanol, and benzyl alcohol were bought, from Shaanxi Xi'an Polymer Light Tech. Corp. China.  $\text{PbBr}_2$ ,  $\text{PbI}_2$ ,  $\text{CsI}$ , anhydrous dimethyl sulfoxide (DMSO) and anhydrous dimethylformamide (DMF) were bought, from Sigma-Aldrich. These reagents and solvents were used directly (without further purification) unless otherwise mentioned.

The low-temperature  $\text{TiO}_2$  was synthesized by solvothermal reaction of  $\text{TiCl}_4$  (1 mL), absolute ethanol (4 mL) and benzyl alcohol (20 mL) at 85 °C for 12 h referred to the literature reported by Tan et al.<sup>1</sup> Thiourea solutions with concentration of 0.05, 0.1 and 0.2  $\text{mol}\cdot\text{L}^{-1}$  (M) were made by mixing predetermined quantities of thiourea into ethanol, respectively. Perovskite precursor solution was made by dissolving  $\text{PbBr}_2$  (0.2 M),  $\text{PbI}_2$  (1.15 M), MABr (0.14 M), FAI (1.10 M), and  $\text{CsI}$  (0.07 M) in anhydrous DMSO/DMF (volume ratio: 1:4) mixed solvent according to Saliba et al. reported previously,<sup>2</sup> which formed a precursor solution with compositions of  $\text{Cs}_{0.07}\text{FA}_{1.1}\text{MA}_{0.14}\text{Pb}_{1.35}\text{I}_{3.47}\text{Br}_{0.414}$ . The solution was heated at 80 °C for 10 min under stirring and nitrogen atmosphere and filtrated with 0.45  $\mu\text{m}$  PTFE filters before using it.

### *Device fabrication*

Figure S1 displays the diagram of the fabrication process of perovskite films. F-doped  $\text{SnO}_2$  conducting glass (FTO,  $1.5 \times 1.5 \text{ cm}^2$ ) was washed with detergent solution, distilled water and alcohol for 20 min, successively. A  $\text{TiO}_2$  electron transport layer was solidified onto the FTO substrate by spin-spraying the synthesized  $\text{TiO}_2$  solution at a spin speed of 2000 rpm for 20 s and then was sintered at 120 °C for 2 min. The spin-spraying was repeated for three times to reach the thickness requirement of the devices. The  $\text{TiO}_2$  electron transport layer was modified with thiourea by spin-spraying the synthesized thiourea solution on the

FTO/TiO<sub>2</sub> at a spin speed of 2000 rpm for 20 s, and then heating at 120 °C for 15 min to evaporated ethanol completely. The resultant film was surface treated with ultraviolet-ozone for 20 min.

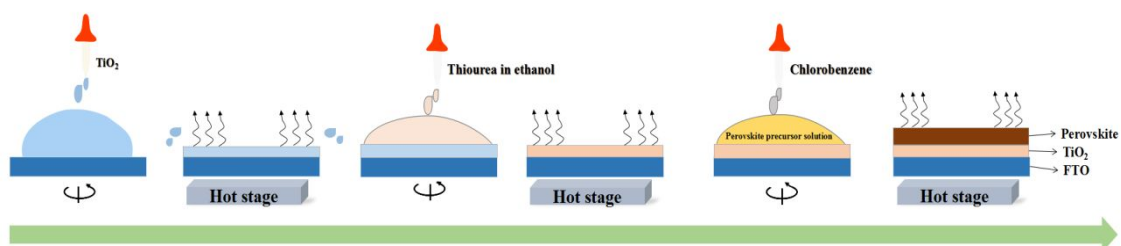

**Figure S1.** Diagram of the fabrication of FTO/thiourea-modified TiO<sub>2</sub>/perovskite films.

Perovskite layer was fixed on the thiourea-modified TiO<sub>2</sub>/FTO by spin-spraying the synthesized perovskite precursor solution (20 mL) at a spin speed of 6500 rpm for 20 s and then sintered at 100 °C for about 40 min. The hole transport layer (HTL) of spiro-MeOTAD was spin-sprayed on the perovskite/TiO<sub>2</sub>/FTO at a spin speed of 4000 rpm for 20 s. Finally, ~80 nm thickness of Au counter electrode was evaporation-coated on the HTL, thus a planar perovskite solar cell with architecture of Au/spiro-MeOTAD/perovskite/thiourea-modified TiO<sub>2</sub>/FTO was fabricated.

### Characterization

Current density-voltage (J-V) curves of perovskite solar cells were recorded under the white light illumination with a light intensity of 100 mW·cm<sup>-2</sup> (AM 1.5G). The incident light intensity was calibrated by using a NREL-calibrated Si cell equipped with a filter of KG-2. With the same instruments, Tafel curves of TiO<sub>2</sub> ETL were recorded by measuring FTO/TiO<sub>2</sub>/Au multilayer films in dark, and the trap state densities of perovskite layers were investigated by measuring FTO/TiO<sub>2</sub>/perovskite/Au multilayer films in dark. The time resolved photoluminescence (TRPL) spectra and the steady state photoluminescence (PL) spectra were obtained by using the time-correlated single photon counting system (TCSPC, model: Omni-l Monochromator). The surface morphology and roughness of the TiO<sub>2</sub> films

were observed by using a conductive atomic force microscope (AFM, model: Mutimode-8J). The contact potential difference (CPD) was recorded with a Kelvin probe force microscopy (KPFM, model: SPA-400). The ultraviolet-visible (UV-Vis) transmittance and absorption spectra were recorded with an UV/Vis-NIR spectrometer (model: Lambda 950). Ultraviolet photoelectron spectroscopy (UPS) and X-ray photoelectron spectroscopy (XPS) were measured on a multifunctional photoelectron spectroscopy (model: Kratos Axis Ultra DLD) in an ultra-high vacuum seal chamber with a vacuum degree  $< 10^{-10}$  Torr, HeI radiation line (21.22 eV) from a discharge lamp. Impedance spectra (IS) for PSCs were measured on an electrochemical workstation (model: ZAHNER IM6e) in dark. During the impedance measurement, a 20 mV alternating current (AC) was provided to ensure a liner response of the impedance analyzer. The sweeping frequency ranged from 100 mHz to 1 MHz.<sup>3,4</sup>

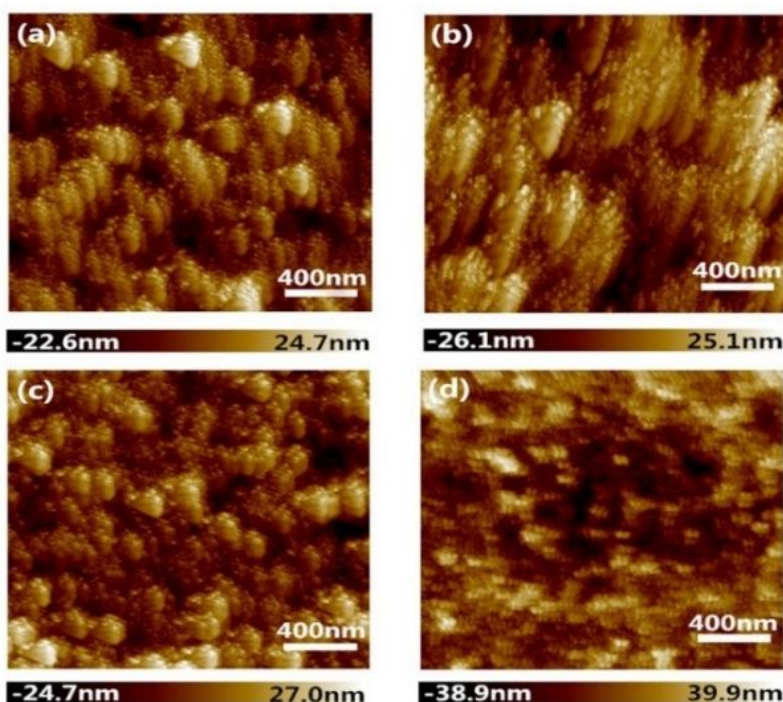

**Figure S2.** AFM images of TiO<sub>2</sub> films modified with different thiourea concentrations of (a) 0 M, (b) 0.05 M, (c) 0.1 M, and (d) 0.2 M.

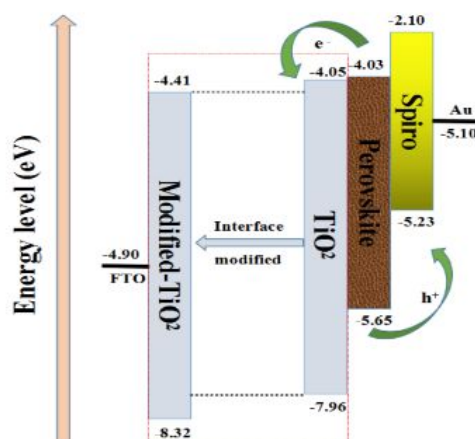

**Figure S3.** Schematic energy level diagram of FTO/TiO<sub>2</sub>/perovskite/spiro-OMETAD/Au devices with and without thiourea modification (the energy level position of TiO<sub>2</sub> calculated from UPS analysis).

## References

- (1) Tan, H.; Jain, A.; Voznyy, O.; Lan, X.; Fp, G. D. A.; Fan, J. Z.; Quintero-Bermudez, R.; Yuan, M.; Zhang, B.; Zhao, Y., Efficient and stable solution-processed planar perovskite solar cells via contact passivation. *Science* **2017**, 355, 722-726.
- (2) Saliba, M.; Matsui, T.; Seo, J.; Domanski, K.; Correa-Baena, J.; Nazeeruddin, M.; Zakeeruddin, S.; Tress, W.; Abate, A.; Hagfeldt, A., Cesium-containing triple cation perovskite solar cells: improved stability, reproducibility and high efficiency. *Energy & Environ. Sci.* **2016**, 9, 1989-1997.
- (3) Mahmud, M. A.; Elumalai, N. K.; Upama, M. B.; Wang, D.; Gonçalves, V. R.; Wright, M.; Xu, C.; Haque, F.; Uddin, A., Passivation of interstitial and vacancy mediated trap-states for efficient and stable triple-cation perovskite solar cells. *J. Power Sources* **2018**, 383, 59-71.
- (4) Tu, Y.; Wu, J.; Zheng, M.; Huo, J.; Zhou, P.; Lan, Z.; Lin, J.; Huang, M., TiO<sub>2</sub> quantum dots as superb compact block layers for high-performance CH<sub>3</sub>NH<sub>3</sub>PbI<sub>3</sub> perovskite solar cells with an efficiency of 16.97%. *Nanoscale* **2015**, 7, 20539-20546.
